# Supplementary material for: A Labile Pool of IQGAP1 Disassembles Endothelial Adherens Junctions
Source: Int J Mol Sci. 2013 Jun 27;14(7):13377–90. doi: 10.3390/ijms140713377 (PMC3742192; doi:10.3390/ijms140713377)

## Supplementary Information

**Figure S1.** Interaction of IQGAP1 with VE-cadherin and catenins,  $\beta$ ,  $\alpha$  and  $\gamma$ . (a–d) HUVEC lysates were immunoprecipitated with antibodies against IQGAP1 or IgG. Representative immunoblots from three independent experiments demonstrated that IQGAP1 associates with VE-cadherin and catenins,  $\beta$ ,  $\alpha$  and  $\gamma$ ; (e–h) Confluent HUVEC monolayers were processed for immunofluorescence microscopy. Note co-localization of IQGAP1 with VE-cadherin and  $\beta$ -,  $\alpha$ - and  $\gamma$ -catenins (Merged). Magnification bars = 10  $\mu$ m.

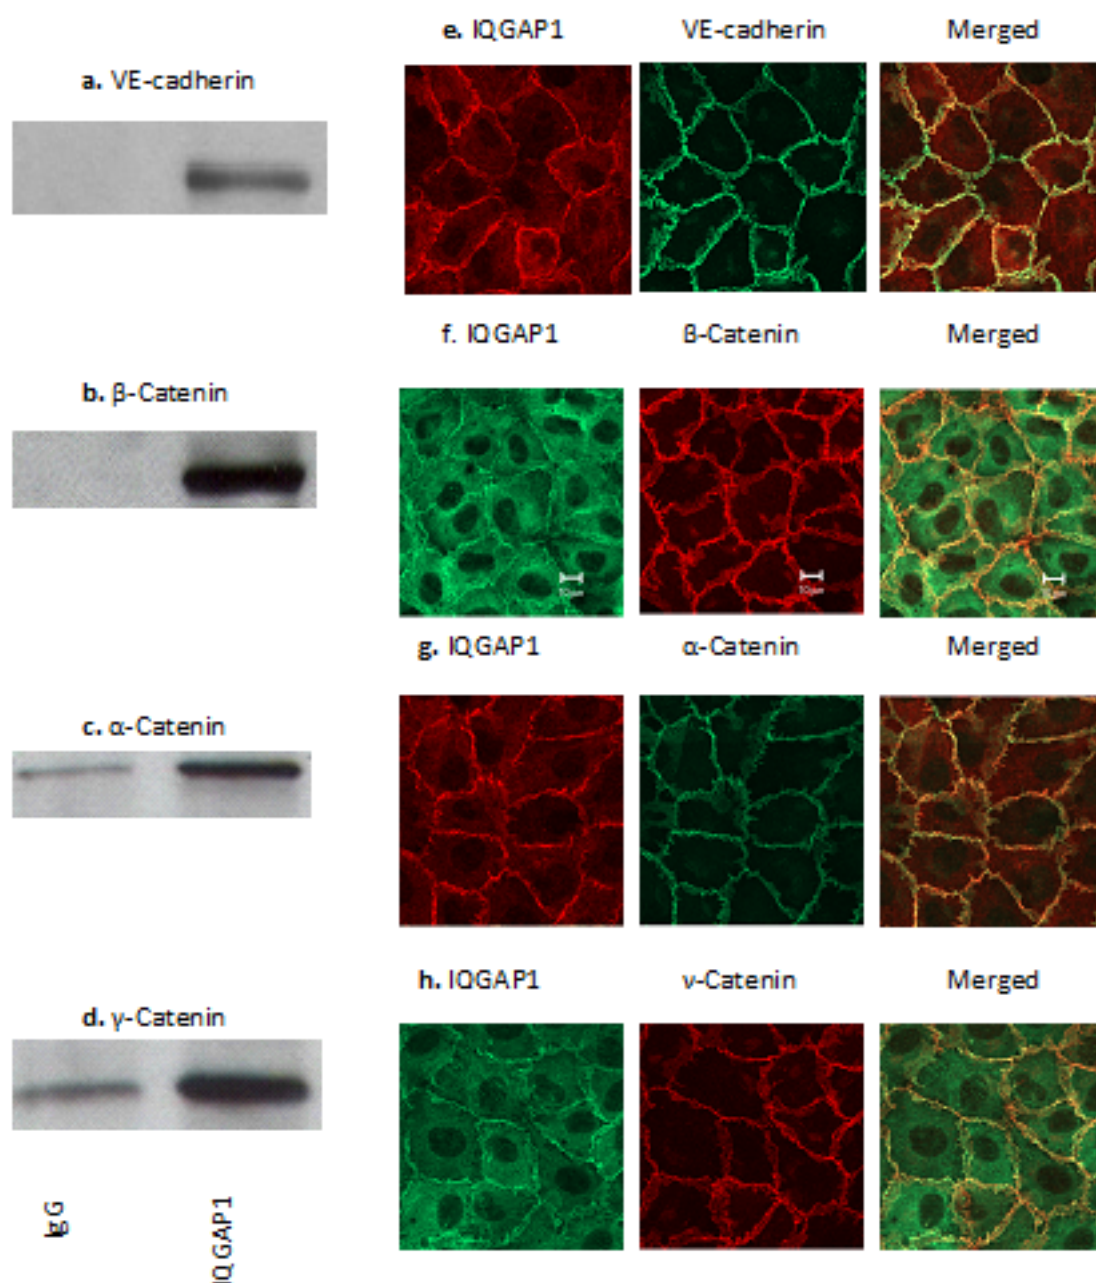

Supplement: Supplementary file 1 [file ijms-14-13377-s001.pdf]
